# Supplementary material for: TOX4 facilitates promoter-proximal pausing and C-terminal domain dephosphorylation of RNA polymerase II in human cells
Source: PubMed Central journal article supplement (PMC8975821; doi:10.1038/s42003-022-03214-1), 2022-04-01
Supplement: 42003_2022_3214_MOESM3_ESM.pdf [file 42003_2022_3214_MOESM3_ESM.pdf]

## Description of Additional Supplementary Files

**File name:** Supplementary Data 1

**Description:** Source data of bar graphs shown in the Figures.
